# Supplementary material
Source: publisher figshare collection journal article supplement (https://gsajournals.figshare.com/ndownloader/files/31397374)
Supplement: Supplementary file 1 [file 31397374]

id	dam	sire
HY28246	P5071	P7509
HY18982	P8886	P3692
HY13693	P6099	P4117
HY39308	P8083	P4537
HY39791	P6259	P4537
HY11159	P3486	P4537
HY18240	P1074	P4537
HY29443	P1832	P4537
HY37369	P5676	P4537
HY22224	P1882	P4537
HY48689	P2502	P4537
HY27767	P4419	P4537
HY47695	P5670	P4537
HY45251	P4629	P4537
HY48699	P6610	P6936
HY41157	P4537	P8232
HY18583	P2171	P4537
HY26143	P8232	P6610
HY17394	P1938	P6610
HY11676	P1938	P8850
HY47535	P8953	P6610
HY32359	P8953	P8232
HY17878	P8510	P4537
HY21830	P1773	P4537
HY21217	P6936	P6610
HY49263	P4238	P6610
HY38140	P3324	P4537
HY37167	P1077	P4537
HY26481	P5308	P4537
HY14339	P8850	P6610
HY28518	P8850	P1938
HY24188	P5085	P4537
HY32721	P3739	P5006
HY39725	P6571	P5006
HY24565	P8083	P4517
HY13581	P3842	P5006
HY15270	P3842	P3743
HY17711	P5660	P4537
HY27623	P1972	P4537
HY40613	P8570	P4537
HY25728	P1151	P4537
HY18075	P6591	P4537
HY27088	P4225	P4537
HY28141	P7603	P4537
HY36758	P4510	P4537
HY34623	P5671	P4537
HY28009	P5671	P8155
HY31479	P3978	P4537
HY26828	P5913	P4537
HY39069	P6418	P4537
HY34746	P5041	P4537
HY15255	P5041	P8155
HY36193	P8776	P4537
HY34497	P6975	P4537
HY33292	P3089	P4537
HY12725	P7830	P4537
HY34407	P7843	P8155
HY14565	P1765	P4537
HY34414	P3289	P8155
HY21268	P5757	P4537
HY16424	P2282	P4537
HY44364	P3767	P8155
HY23782	P8733	P4238
HY30131	P7298	P4238
HY12166	P1719	P4537
HY45211	P2790	P4537
HY18449	P8872	P4517
HY39251	P8081	P4238
HY49474	P1967	P4537
HY26743	P3727	P4537
HY14567	P1938	P6936
HY46594	P1938	P4238
HY23714	P8953	P4851
HY49647	P1796	P4537
HY37304	P2148	P5006
HY11537	P5935	P5006
HY19456	P5935	P4238
HY42406	P5935	P4517
HY14129	P4637	P4238
HY32515	P6936	P4238
HY17652	P6936	P8850
HY25531	P6936	P2807
HY43196	P4238	P6936
HY11276	P4238	P8850
HY27784	P3880	P4238
HY30603	P1077	P4238
HY46954	P6904	P4238
HY12819	P8850	P6936
HY38252	P8850	P4238
HY35506	P8850	P2807
HY20212	P2943	P1113
HY41744	P2943	P3743
HY48458	P2943	P4238
HY22552	P2943	P8155
HY10617	P5085	P8155
HY47307	P8400	P4537
HY49888	P2807	P8850
HY49689	P2141	P4238
HY14024	P5222	P2713
HY41705	P4479	P5006
HY18758	P7058	P7151
HY43965	P8525	P2713
HY10165	P7954	P2713
HY36576	P3313	P7151
HY12277	P6007	P8345
HY30816	P8639	P4238
HY48299	P8639	P8155
HY36837	P1972	P4238
HY23490	P1972	P4517
HY35889	P3864	P4517
HY11089	P3486	P2713
HY30497	P3486	P8345
HY17064	P7924	P4851
HY11502	P6607	P4851
HY24648	P4791	P5006
HY25721	P1151	P4238
HY32643	P5307	P4238
HY47063	P5307	P4517
HY44523	P7603	P4238
HY45346	P4510	P4851
HY41684	P5824	P5006
HY49209	P1222	P5006
HY25030	P1222	P4851
HY17075	P8784	P4851
HY21710	P7034	P5006
HY39757	P7034	P2713
HY49899	P6418	P5006
HY16306	P3761	P8345
HY40026	P4283	P4517
HY10032	P4479	P5006
HY45369	P4085	P5006
HY12224	P5963	P2713
HY13504	P2556	P4517
HY28480	P2556	P8345
HY32188	P7015	P5006
HY12557	P7015	P8345
HY40761	P2411	P4851
HY41079	P5041	P8345
HY42471	P7209	P7361
HY49539	P1142	P4238
HY49612	P3859	P4537
HY26891	P3859	P8155
HY22514	P2908	P8155
HY35053	P2188	P8155
HY41554	P3140	P4537
HY29741	P3140	P8155
HY26305	P5425	P7361
HY23273	P7843	P4238
HY11782	P1383	P4537
HY15670	P2820	P7482
HY22908	P7405	P4851
HY29532	P1765	P4238
HY31921	P1915	P8345
HY34845	P8868	P2713
HY37253	P7579	P4851
HY27193	P2702	P2713
HY23769	P1407	P5006
HY11862	P2226	P3743
HY12424	P2226	P8155
HY14831	P5033	P3743
HY41450	P8528	P4537
HY40628	P8528	P4238
HY23199	P8528	P8155
HY22894	P6374	P4517
HY14606	P5132	P4851
HY11837	P5132	P2713
HY34639	P8797	P8501
HY38288	P7298	P7055
HY26877	P8454	P2713
HY12041	P1676	P4517
HY17001	P2790	P4517
HY46183	P7583	P5006
HY17862	P4056	P4851
HY10643	P2172	P5006
HY14594	P8872	P1516
HY48817	P3373	P5006
HY29999	P6315	P7151
HY17196	P5670	P7151
HY17408	P7701	P7151
HY45621	P3290	P7151
HY19144	P3290	P2713
HY41601	P3037	P5006
HY48770	P1967	P4851
HY24306	P1967	P8345
HY43777	P2171	P2713
HY47494	P8232	P7151
HY28328	P3727	P5006
HY10809	P3727	P2713
HY39296	P3727	P8345
HY20155	P8953	P7151
HY28578	P8953	P2713
HY30676	P8953	P8345
HY38130	P1752	P5006
HY19270	P1752	P8345
HY28138	P7757	P5006
HY16912	P7757	P4851
HY25187	P7757	P7151
HY18876	P1796	P5006
HY11210	P1796	P3743
HY36103	P1796	P4851
HY39847	P1804	P5006
HY32886	P1804	P2713
HY40502	P2148	P4851
HY40559	P2148	P7151
HY46327	P4637	P4851
HY33349	P4637	P2713
HY38522	P2177	P3743
HY18322	P2177	P4238
HY17316	P6824	P5006
HY31404	P3880	P5006
HY34146	P1393	P2713
HY29099	P1597	P5006
HY23218	P3818	P5006
HY44455	P1047	P4851
HY39384	P1047	P2713
HY14149	P3324	P5006
HY21142	P3324	P7151
HY26829	P1118	P4517
HY31431	P5537	P3743
HY47529	P3942	P2713
HY36660	P1296	P5006
HY29314	P1296	P2713
HY19260	P1296	P8345
HY46529	P2943	P5006
HY33692	P2943	P4851
HY35027	P2943	P7055
HY34121	P2943	P2713
HY37847	P2943	P8345
HY41896	P5085	P3743
HY46620	P5085	P2713
HY31736	P8400	P4851
HY48614	P2463	P2713
HY15177	P1537	P8345
HY16562	P1073	P5006
HY33863	P1073	P2713
HY46777	P8001	P4851
HY47528	P2141	P5006
HY11964	P2141	P2713
HY49290	P8276	P4851
HY33410	P4696	P4517
HY25467	P8413	P5006
HY26255	P8413	P4517
HY17205	P5762	P2713
HY18273	P2087	P5006
HY41767	P2087	P4851
HY21153	P1771	P3743
HY24847	P1771	P8345
HY27314	P2376	P7151
HY10065	P4899	P7151
HY17148	P7961	P7151
HY15760	P2256	P7151
HY40988	P5660	P7151
HY45779	P5660	P8345
HY45952	P8024	P5006
HY26518	P7678	P7055
HY38240	P7678	P2713
HY21288	P8570	P2713
HY12456	P1661	P2713
HY41153	P4377	P5006
HY32626	P8894	P4851
HY18058	P8894	P2713
HY15957	P3486	P7151
HY26726	P7924	P7055
HY27122	P7909	P8345
HY20308	P5061	P4851
HY36717	P1151	P4851
HY23254	P1151	P7151
HY11934	P3665	P2713
HY13288	P5307	P5006
HY42270	P6315	P2713
HY32501	P7950	P7151
HY28071	P4510	P7151
HY18429	P4510	P7055
HY18445	P5043	P7151
HY30445	P1222	P7151
HY47070	P1222	P2713
HY43944	P7034	P7151
HY16082	P6549	P7151
HY38168	P6549	P2713
HY35158	P6549	P8345
HY17277	P5671	P5006
HY34688	P5671	P4851
HY18088	P5671	P7151
HY32036	P5671	P8345
HY17834	P3978	P8345
HY17141	P1057	P5006
HY28917	P1057	P4851
HY48089	P1057	P2713
HY47884	P5913	P4851
HY47652	P5913	P7055
HY49849	P5913	P2713
HY43883	P6418	P7151
HY25117	P1302	P4851
HY42381	P5619	P2713
HY22032	P6457	P7151
HY35034	P4283	P7151
HY35366	P5908	P7151
HY27596	P8776	P2713
HY39796	P5183	P2713
HY45483	P3445	P2713
HY46909	P3445	P8345
HY15370	P6975	P5006
HY19657	P6975	P7151
HY36034	P6975	P8345
HY14940	P3089	P4851
HY24629	P7688	P2713
HY24112	P1142	P4851
HY19715	P1142	P7151
HY35048	P1142	P8345
HY40437	P3859	P5006
HY49170	P3859	P2713
HY42117	P3859	P8345
HY44529	P2559	P5006
HY35457	P7830	P7055
HY24988	P7830	P8345
HY25148	P2908	P4851
HY13162	P2908	P7151
HY22144	P2908	P8345
HY24582	P2188	P7151
HY15061	P2188	P2713
HY44487	P4516	P6671
HY14336	P4516	P5929
HY38882	P1482	P4851
HY22806	P1482	P4238
HY13617	P1482	P7151
HY23888	P1482	P2828
HY10845	P1482	P2713
HY26211	P1482	P8345
HY23883	P3140	P2713
HY46024	P3140	P8345
HY19137	P3924	P4446
HY25009	P1610	P7151
HY18043	P1872	P7151
HY14786	P1872	P2713
HY30589	P3017	P7151
HY16147	P3017	P2713
HY38147	P7415	P5006
HY18685	P7415	P2713
HY27163	P7415	P8345
HY21647	P7843	P5006
HY21598	P7843	P4851
HY20074	P7843	P7055
HY32563	P7843	P8345
HY44805	P2765	P5006
HY40756	P2765	P2713
HY46091	P2765	P8345
HY11054	P6774	P4851
HY35417	P6774	P7055
HY30198	P4202	P5006
HY20929	P4202	P4851
HY45652	P4202	P8345
HY38954	P1772	P2713
HY43230	P5862	P7151
HY30767	P6036	P2713
HY47985	P2463	P4851
HY15621	P2463	P7151
HY49219	P7308	P7151
HY40325	P8679	P2713
HY23214	P8679	P8345
HY36495	P1383	P5006
HY46843	P1383	P4238
HY15585	P2820	P3924
HY32055	P5929	P6610
HY35530	P4270	P7151
HY37818	P1765	P7151
HY34410	P1915	P7151
HY48478	P4135	P4851
HY31004	P4135	P7151
HY13572	P4135	P8155
HY17812	P4135	P8345
HY33406	P3427	P4851
HY42683	P3427	P7151
HY16271	P3427	P2713
HY13390	P3427	P8155
HY36844	P3427	P8345
HY11238	P1165	P5006
HY32521	P1165	P3743
HY26295	P1165	P7151
HY44390	P1165	P2713
HY31773	P1165	P8155
HY31312	P1165	P8345
HY35652	P1788	P3743
HY15595	P1788	P4851
HY19032	P1788	P4238
HY13012	P1788	P7151
HY48637	P1788	P2713
HY41516	P4431	P4537
HY16155	P4431	P7151
HY17773	P4431	P2713
HY45520	P5613	P2713
HY15413	P5613	P8345
HY27851	P5757	P5006
HY30695	P5757	P7151
HY16603	P5757	P2713
HY20654	P3957	P7151
HY29552	P2226	P7055
HY20759	P4773	P7151
HY15904	P5724	P8345
HY24588	P5033	P5006
HY27744	P5033	P8345
HY15615	P5593	P7151
HY28553	P5593	P7055
HY36269	P7081	P5006
HY38119	P7081	P4537
HY28201	P7081	P4851
HY25273	P7081	P1516
HY38952	P1990	P3743
HY31902	P1990	P4851
HY23257	P1990	P4238
HY13481	P1990	P7151
HY49130	P1990	P7055
HY39344	P2160	P5006
HY49399	P2282	P5006
HY29024	P2282	P7151
HY43233	P8528	P7151
HY47904	P8528	P2713
HY13366	P3862	P5006
HY34352	P3862	P7151
HY35715	P8426	P7055
HY42796	P6374	P5006
HY30557	P6374	P7151
HY37826	P3744	P3191
HY45269	P7298	P7151
HY48774	P1676	P5006
HY38515	P1719	P7055
HY44328	P1719	P2713
HY18621	P3128	P7151
HY37711	P5938	P7151
HY15911	P2317	P7055
HY35672	P2790	P4851
HY24976	P7583	P2713
HY33580	P4056	P7151
HY46937	P8872	P7151
HY42843	P6865	P7151
HY40679	P6865	P2713
HY32233	P1683	P4851
HY24268	P1683	P2713
HY30783	P1683	P8345
HY26753	P1967	P7055
HY39628	P3727	P7151
HY39440	P3727	P7055
HY19533	P1796	P7151
HY42227	P4637	P7151
HY31438	P4066	P5006
HY33864	P4066	P4851
HY30669	P2055	P5006
HY40831	P2055	P4851
HY47574	P2055	P4517
HY39686	P2055	P7151
HY14568	P2055	P2713
HY21744	P5651	P7151
HY34071	P6852	P7151
HY37151	P1597	P7055
HY24697	P7361	P7151
HY13570	P1118	P7151
HY24582	P1296	P7151
HY10526	P5681	P5006
HY28634	P2943	P7151
HY45054	P5085	P7151
HY44152	P3346	P7151
HY36462	P2463	P7151
HY38095	P4819	P8345
HY34935	P3326	P5006
HY48488	P3326	P2713
HY13730	P3259	P7151
HY20471	P3259	P2713
HY14706	P8001	P7151
HY15600	P8001	P7055
HY23540	P8001	P2713
HY24684	P3131	P7151
HY23850	P4696	P7151
HY36695	P4696	P2713
HY15058	P8413	P2713
HY26131	P7785	P7151
HY28485	P2087	P7151
HY24817	P2087	P2713
HY35700	P1771	P7151
HY31013	P2943	P4537
HY12929	P5613	P4537
HY20330	P8413	P4537
HY12797	P7804	P7509
HY19320	P4788	P6338
HY33940	P4238	P3885
HY45272	P1077	P6936
HY10997	P5762	P4537
HY34280	P2087	P4537
HY19819	P8626	P3115
HY35725	P7757	P7782
HY24683	P6759	P7579
HY17446	P4615	P8850
HY30044	P4615	P6690
HY36710	P3727	P2943
HY19767	P3727	P4517
HY24500	P3727	P4738
HY36415	P3727	P2828
HY18627	P7632	P6936
HY17863	P7632	P3115
HY46854	P7701	P6936
HY15004	P5308	P7579
HY47124	P6857	P1910
HY16659	P6857	P3115
HY24148	P6857	P5311
HY42728	P5603	P1796
HY30936	P5603	P1957
HY47807	P5311	P2342
HY10333	P5311	P2943
HY47059	P5311	P1846
HY10341	P3686	P6936
HY47389	P3686	P5311
HY22873	P5397	P4738
HY36419	P5397	P1102
HY44830	P5397	P6690
HY18605	P5397	P8943
HY43835	P4058	P3840
HY28888	P7210	P1102
HY24070	P7210	P3115
HY48882	P7210	P8943
HY16338	P3324	P2943
HY33765	P3856	P8850
HY43638	P5168	P2943
HY32986	P5168	P5364
HY25188	P5168	P3115
HY47140	P5168	P5648
HY33441	P1031	P4517
HY20247	P1031	P4738
HY10616	P1031	P2345
HY16198	P1031	P1102
HY14427	P8548	P1796
HY36518	P8548	P7579
HY29572	P8548	P8943
HY26595	P8125	P1910
HY38028	P8125	P3115
HY35329	P8768	P8850
HY39321	P8768	P4517
HY12880	P8768	P5364
HY12262	P8768	P3115
HY10135	P1930	P2342
HY46753	P8143	P6886
HY25421	P2052	P1957
HY13747	P4193	P6886
HY36109	P6262	P6886
HY45141	P6262	P3115
HY46491	P7556	P6936
HY27747	P7556	P8850
HY43881	P5966	P1796
HY14562	P5966	P1910
HY32137	P5966	P3115
HY38529	P5966	P7782
HY10430	P3755	P2342
HY47697	P3755	P7579
HY47154	P3755	P4517
HY46207	P1109	P7579
HY31000	P1109	P3115
HY12100	P4016	P2943
HY44319	P4016	P5085
HY41333	P4016	P6886
HY11175	P4016	P1910
HY10206	P4016	P3115
HY18379	P7243	P5085
HY25472	P7243	P6886
HY18448	P7243	P8850
HY32234	P7243	P7782
HY36594	P1872	P1102
HY39392	P1872	P3115
HY49808	P7034	P6886
HY27176	P7034	P1102
HY39685	P4188	P2342
HY29832	P6485	P3115
HY24565	P6498	P3115
HY31875	P1209	P7579
HY13893	P1209	P2943
HY36722	P7037	P1796
HY18638	P7037	P7579
HY27706	P7037	P1910
HY31687	P7037	P4738
HY23728	P7037	P3115
HY27736	P7037	P7782
HY43676	P1416	P2342
HY33738	P1416	P3115
HY28162	P1347	P2943
HY10465	P3173	P1102
HY29806	P7434	P7579
HY25277	P7434	P2943
HY11335	P7434	P7782
HY22541	P4402	P1102
HY36258	P5554	P2943
HY37022	P5554	P6886
HY20502	P4709	P2342
HY29152	P8418	P7740
HY49606	P4254	P2342
HY28912	P5414	P7579
HY48520	P5414	P6886
HY40558	P5414	P3115
HY47022	P6151	P7579
HY32411	P6151	P3115
HY44384	P2811	P6936
HY14220	P2811	P3115
HY30597	P1499	P7579
HY12894	P1499	P3115
HY49262	P3111	P3115
HY24948	P1510	P6886
HY38344	P1510	P7782
HY33982	P1996	P1796
HY23144	P1996	P1102
HY17892	P4572	P2342
HY32066	P1699	P1102
HY22350	P6063	P7579
HY42147	P6063	P2943
HY48294	P3665	P7579
HY11273	P3665	P3115
HY19609	P5288	P7579
HY24089	P5288	P3840
HY40593	P4829	P8850
HY46883	P4829	P2345
HY33941	P4829	P1102
HY11724	P4253	P8001
HY14616	P7794	P2943
HY30047	P7794	P6886
HY34706	P7691	P5311
HY41065	P1389	P3115
HY37093	P7332	P1796
HY40826	P7332	P7579
HY22936	P2734	P7579
HY40535	P2734	P8850
HY22704	P2734	P1102
HY39134	P2734	P6690
HY12374	P1901	P1796
HY37887	P1901	P1910
HY35044	P1901	P5311
HY18137	P5418	P2943
HY17257	P5418	P6690
HY41295	P5418	P7740
HY34116	P5418	P3115
HY35678	P6774	P6936
HY21653	P6774	P2943
HY25916	P5033	P6886
HY46065	P8428	P4738
HY38693	P4073	P8850
HY45125	P4073	P3115
HY19848	P2379	P8850
HY27444	P2379	P3115
HY27926	P7277	P6690
HY15770	P3500	P5311
HY39251	P6442	P3115
HY28847	P5043	P6886
HY46482	P5043	P8850
HY21257	P4772	P3115
HY13628	P3956	P6886
HY31470	P3751	P2601
HY46665	P3751	P8850
HY19465	P5697	P2943
HY15301	P5697	P3115
HY33056	P3813	P7579
HY42874	P3813	P8850
HY46005	P7792	P6886
HY29785	P1579	P3115
HY22459	P1731	P2342
HY40707	P6285	P1796
HY17212	P6285	P7579
HY28091	P6285	P2943
HY36897	P6285	P4517
HY16718	P6285	P2345
HY48845	P6285	P1102
HY11483	P6285	P1846
HY48248	P6285	P6690
HY37016	P6285	P3115
HY41313	P6944	P6936
HY24294	P6944	P7579
HY10548	P3220	P1796
HY49995	P5295	P1846
HY18609	P6772	P3115
HY39870	P4152	P2345
HY12823	P4152	P8943
HY32606	P6727	P6886
HY21757	P6727	P1910
HY39120	P4955	P5364
HY15733	P4955	P3115
HY20886	P2695	P2342
HY46960	P2695	P7579
HY48169	P2695	P2943
HY38560	P2695	P1910
HY19404	P2695	P4738
HY28355	P2695	P1033
HY29096	P2695	P3115
HY10197	P2695	P8943
HY16747	P2695	P7782
HY41292	P2695	P2828
HY45342	P3115	P7579
HY47181	P3115	P4517
HY13027	P1941	P7579
HY33433	P1941	P8850
HY31357	P1941	P1606
HY24684	P1941	P7740
HY49705	P1941	P3115
HY31589	P1941	P7782
HY33694	P5961	P7579
HY31643	P2394	P1102
HY27540	P3258	P3115
HY22327	P5459	P8850
HY39684	P5459	P3115
HY15033	P3222	P6690
HY21882	P3222	P3115
HY32500	P4809	P2943
HY42285	P4809	P1910
HY30578	P4809	P3115
HY34948	P4809	P7782
HY10109	P8060	P1796
HY17770	P8060	P2943
HY25503	P8060	P8850
HY25331	P8060	P4738
HY47662	P8060	P1846
HY39572	P8060	P3115
HY27195	P8060	P7782
HY27918	P3361	P6936
HY49434	P3361	P1102
HY32273	P1998	P2943
HY44291	P1998	P6690
HY20643	P1998	P3115
HY10989	P1998	P1957
HY42601	P3368	P3115
HY37265	P5860	P3115
HY18205	P4645	P6936
HY11024	P2893	P1102
HY17021	P4231	P7579
HY44935	P4231	P2943
HY33343	P4231	P4517
HY20873	P4231	P3115
HY45235	P3787	P2342
HY10080	P3787	P4738
HY38380	P3787	P2345
HY39759	P3787	P3115
HY35043	P6353	P4738
HY23332	P4013	P6886
HY10790	P4013	P1102
HY18084	P5346	P7782
HY10546	P4131	P6936
HY13311	P4131	P2943
HY26407	P4131	P1910
HY35310	P4131	P4738
HY47301	P4131	P6690
HY43025	P4131	P3115
HY18452	P4131	P8943
HY15777	P4131	P2828
HY15577	P1354	P2943
HY36342	P1354	P1910
HY44397	P1354	P4517
HY11175	P1354	P8186
HY29670	P1354	P1846
HY25395	P1354	P5364
HY33852	P1354	P7782
HY19512	P1354	P2828
HY29199	P6315	P7579
HY10951	P6315	P1910
HY10728	P6315	P8850
HY26355	P6315	P3115
HY25965	P6315	P7782
HY37306	P2078	P2943
HY34427	P4150	P2342
HY48386	P4150	P2943
HY15162	P4150	P8850
HY28274	P4150	P3115
HY36173	P3505	P1033
HY12811	P3505	P1102
HY41890	P3505	P6690
HY13097	P3505	P5364
HY46266	P3505	P7740
HY39066	P3505	P3115
HY49524	P3505	P5311
HY28385	P1083	P1796
HY24618	P1083	P7579
HY13028	P1083	P5085
HY45837	P1083	P6886
HY43482	P1083	P4738
HY40756	P1083	P6690
HY14237	P1083	P7782
HY11938	P8714	P1393
HY32190	P7466	P8714
HY21773	P2241	P8714
HY44804	P8053	P1323
HY45657	P1323	P8714
HY15248	P2805	P8714
HY17140	P5988	P6507
HY19537	P6507	P2907
HY14263	P6507	P7549
HY12113	P2947	P6610
HY41376	P5187	P4042
HY28469	P7701	P3600
HY36408	P2601	P6507
HY28954	P6034	P6610
HY32155	P6034	P3600
HY18959	P3526	P6543
HY44194	P3526	P8020
HY36000	P1073	P6610
HY44078	P2284	P7185
HY43192	P2284	P6213
HY42742	P4131	P1354
HY28550	P4131	P4150
HY31242	P1354	P4150
HY16538	P4676	P4150
HY39054	P4150	P1354
HY20107	P3505	P1354
HY41625	P4016	P7740
HY30784	P4540	P6886
HY16881	P3332	P3115
HY21679	P7792	P3115
HY13525	P1595	P1323
